# Supplementary material for: Estimating global economic well-being with unlit settlements
Source: PubMed Central journal article supplement (PMC9072384; doi:10.1038/s41467-022-30099-9), 2022-05-05
Supplement: 41467_2022_30099_MOESM1_ESM.pdf [file 41467_2022_30099_MOESM1_ESM.pdf]

1 **Estimating global economic well-being with unlit settlements**

2  
3  
4  
5  
6  
7  
8  
9  
10  
11  
12  
13  
14  
15  
16  
17  
18  
19  
20  
21  
22  
23  
24  
25  
26  
27  
28  
29  
30  
31  
32  
33  
34  
35  
36  
37  
38

- Ian McCallum <sup>1</sup>
- Christopher Conrad Maximillian Kyba <sup>2</sup>
- Juan Carlos Laso Bayas <sup>1</sup>
- Elena Moltchanova <sup>3</sup>
- Matt Cooper <sup>4</sup>
- Jesus Crespo Cuaresma <sup>5, 1</sup>
- Shonali Pachauri <sup>1</sup>
- Linda See <sup>1</sup>
- Olga Danylo <sup>1</sup>
- Inian Moorthy <sup>1</sup>
- Myroslava Lesiv <sup>1</sup>
- Kimberly Baugh <sup>6</sup>
- Christopher D. Elvidge <sup>7</sup>
- Martin Hofer <sup>1</sup>
- Steffen Fritz <sup>1</sup>

<sup>1</sup> International Institute for Applied Systems Analysis, Schlossplatz 1, A-2361, Laxenburg, Austria

<sup>2</sup> GFZ, German Research Centre for Geosciences, Telegrafenberg, 14473, Potsdam, Germany

<sup>3</sup> School of Mathematics & Statistics, University of Canterbury, Private Bag 4800, 8041, Christchurch, New Zealand

<sup>4</sup> T.H. Chan School of Public Health, Harvard University, 677 Huntington Ave, 02115, Boston, MA, USA

<sup>5</sup> Vienna University of Economics and Business, Welthandelsplatz 1, 1020, Vienna, Austria

<sup>6</sup> Cooperative Institute for Research in the Environmental Sciences, University of Colorado, 216 UCB, 80309 Boulder, CO, USA

<sup>7</sup> Earth Observation Group, Payne Institute for Public Policy, Colorado School of Mines, 1500 Illinois St., 80401, Golden, CO, USA

39 **Supplementary Information**

40

41 **Continental and national statistics**

42

43 As a first step, we analyzed the continental statistics for unlit settlements. The following table  
44 (Supplementary Table 1) provides, by continent, the total area of all human World Settlement  
45 Footprint (WSF) settlements (km<sup>2</sup>), the total area of unlit WSF settlements (km<sup>2</sup>) the percentage  
46 of unlit WSF settlements, the percentage of unlit urban settlements and the percentage of unlit  
47 rural settlements. See methods for details on how these were calculated.

48

49 Supplementary Table 1. Continental statistics of Total WSF settlement area (km<sup>2</sup>), Unlit WSF  
50 settlement area (km<sup>2</sup>), Total Percent Unlit (%), Urban Unlit (%) and Rural Unlit (%).

51

| Continent     | Total_WSF (km2) | Unlit_WSF (km2) | Total Percent Unlit (%) | Urban Unlit (%) | Rural Unlit (%) |
|---------------|-----------------|-----------------|-------------------------|-----------------|-----------------|
| Africa        | 113923          | 44219           | 39                      | 14              | 65              |
| Asia          | 593547          | 137584          | 23                      | 13              | 40              |
| Europe        | 290257          | 47876           | 16                      | 3               | 27              |
| North America | 202057          | 12031           | 6                       | 0               | 15              |
| Oceania       | 15733           | 2179            | 14                      | 0               | 33              |
| South America | 57024           | 1202            | 2                       | 0               | 8               |

52

53

54 Likewise, for each country, we summarized the total area of human WSF settlements (km<sup>2</sup>), the  
55 total area of unlit WSF settlements (km<sup>2</sup>), the total percentage of the unlit settlements, the  
56 percent of urban unlit settlements and the percent of rural unlit settlements (Supplementary  
57 Data). These data were used to produce Figure 1 a and b in the main document. Supplementary

58 Figs. 1-2 below demonstrate the global country-level unlit settlement percentages for urban and  
59 rural areas respectively. See methods for details on how these were calculated.

60

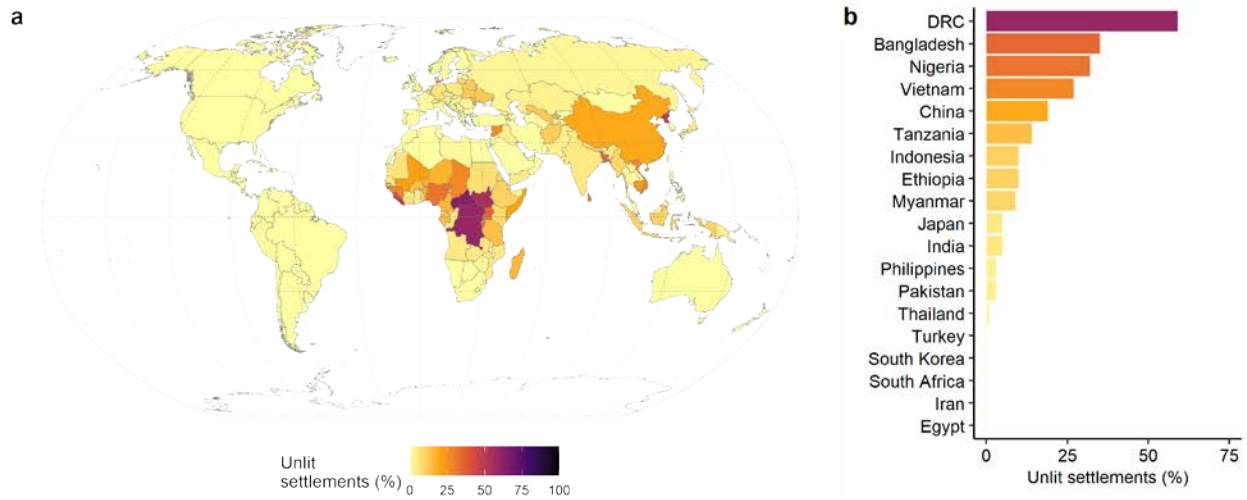

61

62

63 Supplementary Fig. 1. Global country-level unlit settlement percentages for urban areas. a) map  
64 of countries classified according to their percentage of settlements (building footprints) with no  
65 associated satellite-derived nighttime radiance in urban areas; b) African and Asian countries  
66 with population exceeding 50 million ranked according to percentage of urban unlit settlements.

67

68

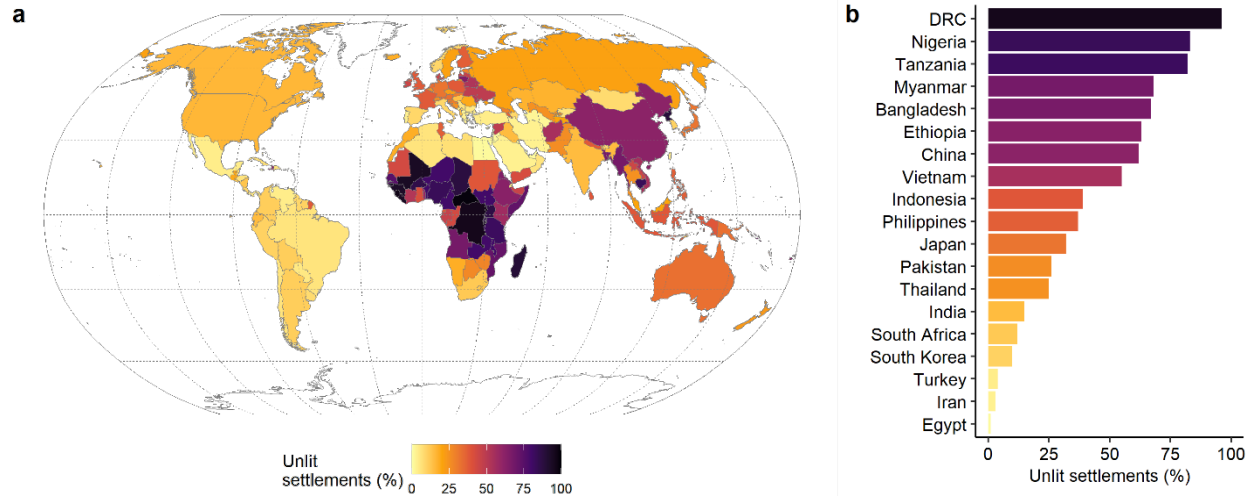

69

70

71 Supplementary Fig. 2. Global country-level unlit settlement percentages for rural areas. a) map  
 72 of countries classified according to their percentage of settlements (building footprints) with no  
 73 associated satellite-derived nighttime radiance in rural areas; b) African and Asian countries with  
 74 population exceeding 50 million ranked according to percentage of rural unlit settlements.

75

76

77 **Urban Population**

78

79 One of the factors playing a potential role in the amount of unlit human settlements within a  
 80 country is the percentage of the total population that is urban (Supplementary Fig. 3). Clearly  
 81 visible here are the high rates of urbanization in most of South America which might partially  
 82 explain the low rates of unlit infrastructure there.

83

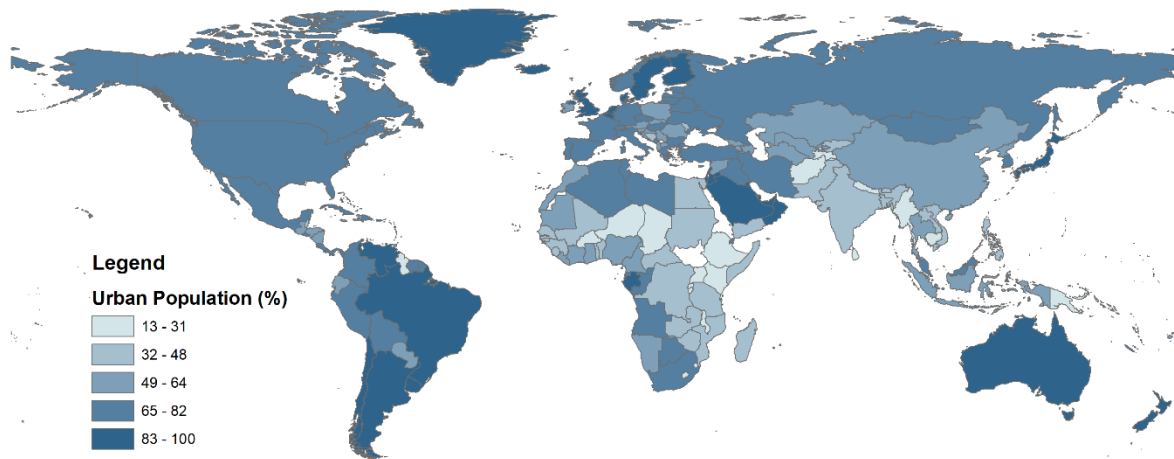

84

85 Supplementary Fig. 3. Urban population (% of total population). Source:

86 <https://data.worldbank.org/indicator>

87

88

### 89 **Consumption and Unlit Settlements**

90 The World Bank's Living Standards Measurement Study (LSMS) allows for the computation of

91 consumption spending from geocoded household surveys. Similar to a recent study on poverty

92 prediction<sup>1</sup>, we have generated a comparison between percent unlit infrastructure and

93 consumption for four African countries (Supplementary Fig. 4). The majority of the rural

94 household clusters experience high levels of unlit settlements and low levels of consumption.

95 Urban households tend to experience higher levels of consumption and lower levels of unlit

96 settlements, while generally remaining above the extreme poverty line. Nonetheless, some urban

97 households are found to be associated with higher levels of unlit settlements, possibly pointing to

98 urban slum areas recorded during surveys.

99

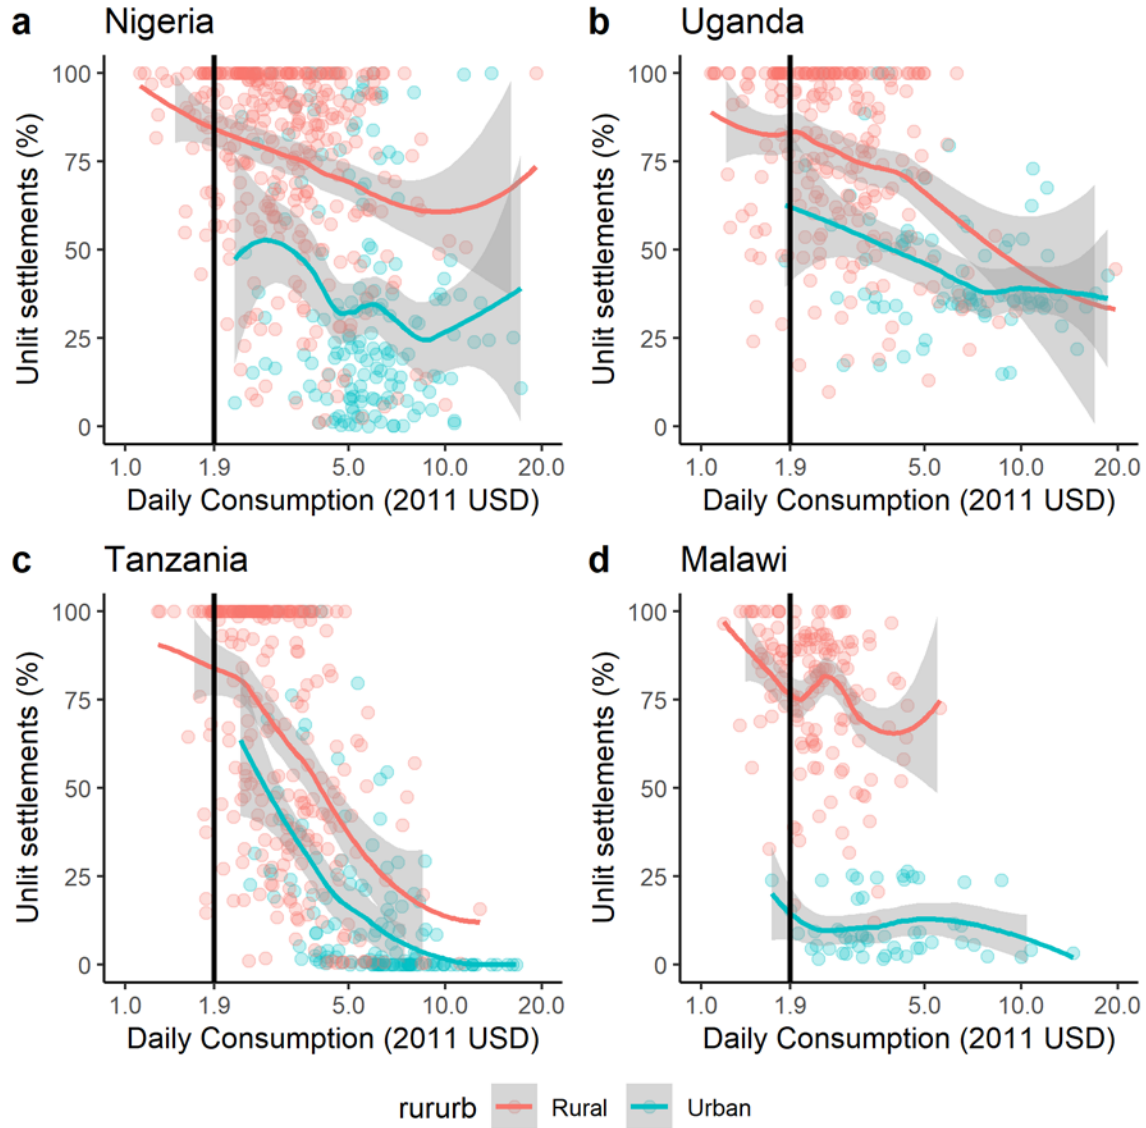

100

101 Supplementary Fig. 4. Relationship between daily per capita consumption expenditure (measured

102 in 2011 U.S. dollars) and unlit settlements (%) at the cluster level for four African countries (a-

103 d), based on LSMS household surveys. Vertical black lines show the official international

104 extreme poverty line (\$1.90 per person per day), and colored lines (red, blue) are fits to the data

105 points for rural and urban clusters with corresponding 95% confidence intervals in grey.

106

107

108 **Bivariate regressions**

109

110 Comparable to studies with established relationships between economic indicators and radiance<sup>2-</sup>  
111 <sup>7</sup>, we find significant relationships by continent between unlit settlement footprint fraction and  
112 GDP (per capita), along with electricity consumption (per capita), secondary school enrollment  
113 (% gross) and urban population (%) (Supplementary Fig. 5). Bivariate regressions (log-log) were  
114 used to model relationships within continents, treating each country as a unique observation (see  
115 Methods). In particular, the relationships are found to be statistically significant for Africa and  
116 Asia across all four indicators with large effect sizes, but less so for other continents  
117 (Supplementary Table 3).

118

119 For Africa and Asia, a 10% increase in the GDP per capita was associated with an average 10%  
120 and 9% decrease in the odds of the area being unlit, respectively. A 10% increase in per capita  
121 electricity consumption was associated with, on average, a 6% and 7% decrease in the odds of  
122 the area being unlit, for Africa and Asia, respectively. An increase of 10% in the odds of school  
123 enrollment was associated with, on average, a 3% and 2% decrease in the odds of the area being  
124 unlit, while an extra 10% in the odds of the population being urban was associated with, on  
125 average, a 4% and 3% decrease in the odds of the area being unlit, for Africa and Asia,  
126 respectively. Across all economic indicators, Africa and Asia have notably a higher share of unlit  
127 settlements than other continents, along with generally lower levels of GDP per capita, electricity  
128 consumption, school enrollment and urban population.

129

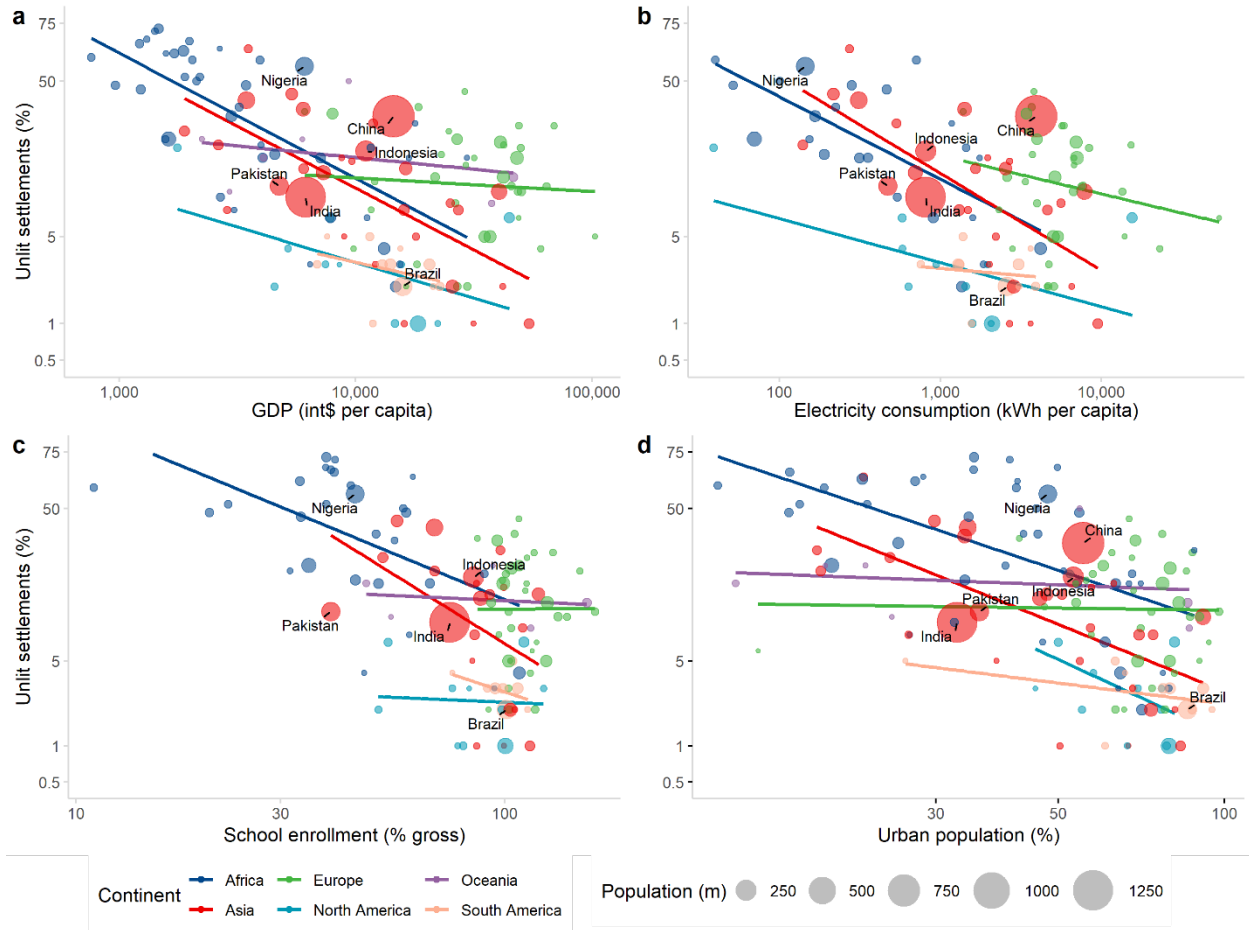

130

131

132 Supplementary Fig. 5. Observed trends between unlit settlement footprints and world  
 133 development indicators by continent, namely, a) GDP per capita; b) electricity consumption  
 134 (kWh per capita); c) school enrollment (% gross); and d) urban population (%). Oceania was  
 135 excluded from 2b) having only two data points. School enrollment 2c) may exceed 100% due to  
 136 over enrollment. Colors refer to continents with dot area proportional to population size  
 137 (millions). Lines represent modeled trends (bivariate regressions log-log). Countries with more  
 138 than 200 million inhabitants are labeled. Logit transformations are applied for school enrollment  
 139 and urban population, whereas log transformations for GDP and electricity consumption.

140



141  
 142 Bivariate regressions (log-log) were used to model relationships by continent between the unlit  
 143 settlement footprint fraction and GDP (per capita), electricity consumption (per capita), school  
 144 enrollment (%) and urban population (%), with results of bivariate regressions by continent and  
 145 indicator provided in Supplementary Tables 2-5.

146  
 147  
 148 Supplementary Table 2. The effects of a 10% increase in GDP (per capita) on the odds of an area  
 149 being unlit (%).

| Continent            | Estimate | 95% CI          | p-value |
|----------------------|----------|-----------------|---------|
| <b>Africa</b>        | -9.81    | (-12.55; -6.99) | <0.0001 |
| <b>Asia</b>          | -9.25    | (-12.75; -5.62) | <0.0001 |
| <b>Europe</b>        | -1.07    | (-5.9; 4.01)    | 0.6755  |
| <b>North America</b> | -5.43    | (-11.5; 1.05)   | 0.1012  |
| <b>Oceania</b>       | -1.81    | (-7.8; 4.57)    | 0.5705  |
| <b>South America</b> | -4.05    | (-17.39; 11.45) | 0.5896  |

151  
 152  
 153 Supplementary Table 3. The effects of a 10% increase in electricity consumption (per capita) on  
 154 the odds of an area being unlit (%). As Oceania contained only two data points, its results can be  
 155 ignored.

156

| Continent            | Estimate | 95% CI            | p-value |
|----------------------|----------|-------------------|---------|
| <b>Africa</b>        | -6.27    | (-9.12; -3.33)    | 0.0001  |
| <b>Asia</b>          | -7.33    | (-10.25; -4.33)   | <0.0001 |
| <b>Europe</b>        | -2.97    | (-7.39; 1.65)     | 0.2064  |
| <b>North America</b> | -3.4     | (-7.23; 0.6)      | 0.0977  |
| <b>Oceania</b>       | 55.02    | (-85.98; 1614.65) | 0.7215  |
| <b>South America</b> | -1.1     | (-11.47; 10.48)   | 0.8448  |

157

158

159 Supplementary Table 4. The effects of a 10% increase in the odds of school enrollment

160 (secondary) on the odds of an area being unlit (%).

161

| Continent            | Estimate | 95% CI         | p-value |
|----------------------|----------|----------------|---------|
| <b>Africa</b>        | -3.05    | (-4.66; -1.41) | 0.0006  |
| <b>Asia</b>          | -1.25    | (-2.64; 0.15)  | 0.085   |
| <b>Europe</b>        | 0.54     | (-2.8; 3.99)   | 0.7567  |
| <b>North America</b> | -0.6     | (-3.19; 2.07)  | 0.6599  |
| <b>Oceania</b>       | 0.96     | (-2.97; 5.06)  | 0.638   |
| <b>South America</b> | -0.34    | (-3.87; 3.33)  | 0.8553  |

162

163

164 Supplementary Table 5. The effects of a 10% increase in the odds of an urban population on the

165 odds of an area being unlit (%).

166

| Continent            | Estimate | 95% CI         | p-value |
|----------------------|----------|----------------|---------|
| <b>Africa</b>        | -3.69    | (-5.12; -2.24) | <0.0001 |
| <b>Asia</b>          | -3.52    | (-5.17; -1.85) | 0.0001  |
| <b>Europe</b>        | -0.37    | (-1.9; 1.18)   | 0.6363  |
| <b>North America</b> | -2.9     | (-7.09; 1.48)  | 0.194   |
| <b>Oceania</b>       | -0.6     | (-2.85; 1.69)  | 0.6039  |
| <b>South America</b> | -0.74    | (-3.23; 1.81)  | 0.5657  |

167

168

169 **Demographic and Health Surveys**

170

171 The relationship between the percentage of unlit settlements and a harmonized geo-spatial wealth  
 172 index (DHS) was used to develop our approach. The DHS locations we used are shown in  
 173 Supplementary Fig. 6.

174

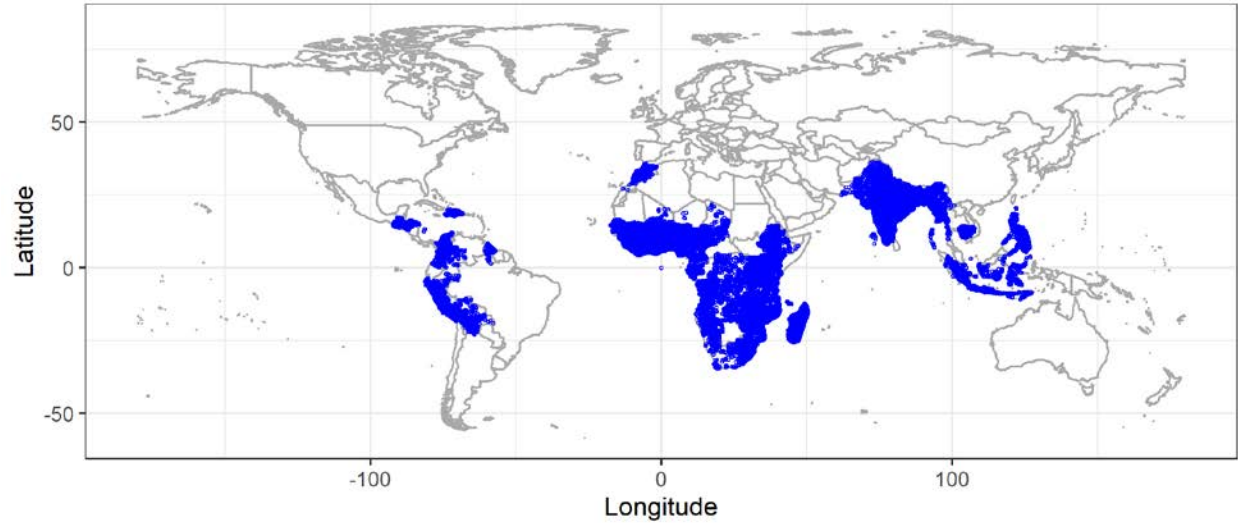

175  
176 Supplementary Fig. 6. Locations of 100,602 harmonized DHS geo-located villages (blue dots)  
177 used in this study. A total of ~2,400,000 households were used as input to create the village-level  
178 data across 51 countries.

179  
180 Category-specific accuracies were determined for each country using Naïve Bayes with 10-fold  
181 cross-validation. The results by continent and country are presented in Supplementary Tables 6-8  
182 for Africa, Asia and the Americas respectively. We present results by aggregated wealth class,  
183 along with an overall value for each country. Supplementary Figs. 7, 8 and 9 present boxplots of  
184 the country-level results for Africa, Asia and the Americas, split by urban and rural  
185 classification, respectively. Supplementary Table 9 presents the overall accuracy by continent for  
186 rural and urban areas.

187

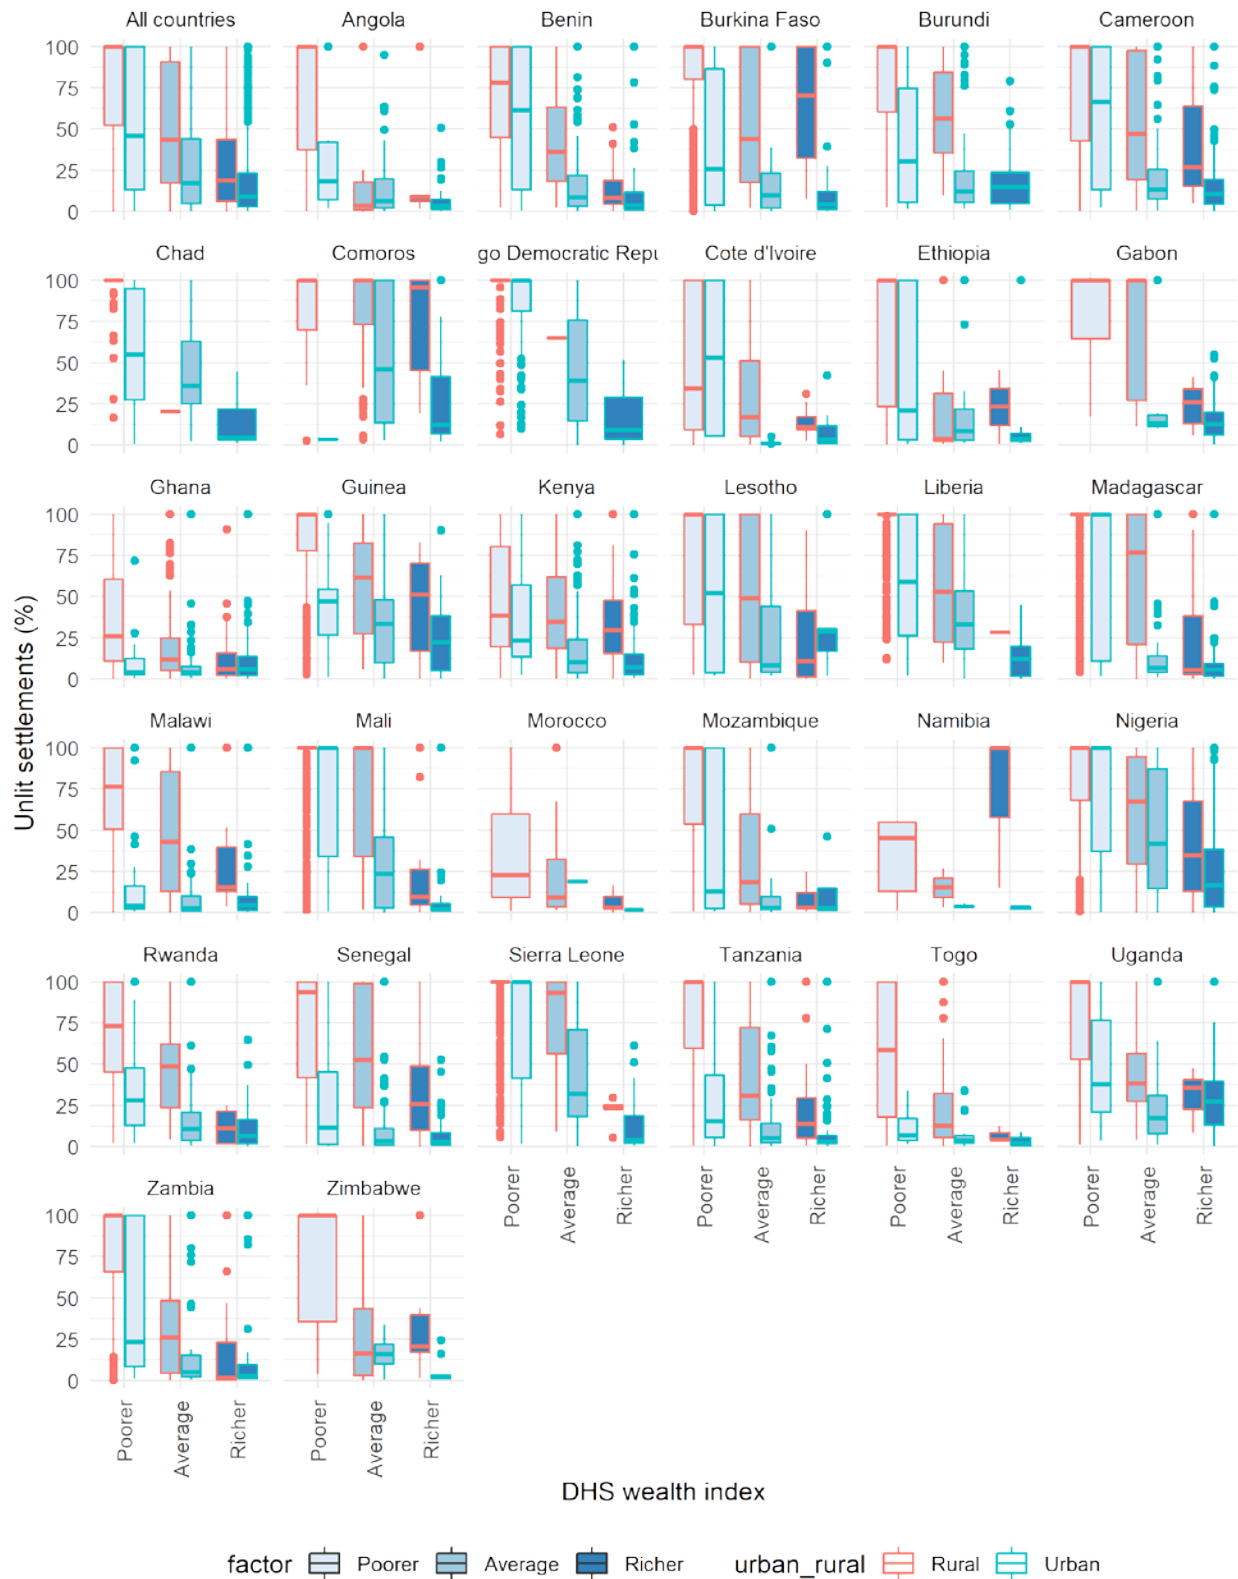

189 Supplementary Fig. 7. Boxplots for African countries showing the mean percentage area of unlit  
 190 settlements within a 2 km buffer (urban) or 5 km buffer (rural) of a DHS household cluster  
 191 against the mode of the wealth indices of all households assigned to the household cluster. The  
 192 midline represents the median with the lower and upper limits of the box being the 1<sup>st</sup> and 3<sup>rd</sup>  
 193 quartiles.

194

195 Supplementary Table 6. Category-specific accuracy by country for Africa.

196

|                     | Poorer | Average | Richer | Overall |
|---------------------|--------|---------|--------|---------|
| Angola              | 99     | 91.2    | 89.6   | 95.5    |
| Benin               | 99.4   | 68.6    | 73.8   | 95      |
| Burkina Faso        | 98.2   | 84.6    | 88.7   | 93.9    |
| Burundi             | 98.4   | 76.8    | 89.2   | 94.9    |
| Cameroon            | 100    | 90      | 100    | 98.9    |
| Chad                | 99.3   | 78.6    | 100    | 95.9    |
| Comoros             | 96.6   | 78      | 90.3   | 90      |
| Congo               | 99     | 81.6    | 73.6   | 96.7    |
| Democratic Republic |        |         |        |         |
| Cote d'Ivoire       | 100    | 53.9    | 99.3   | 94.7    |
| Ethiopia            | 99.2   | 87.3    | 93.9   | 97      |
| Gabon               | 95.3   | 83.9    | 82.1   | 90.7    |
| Ghana               | 50     | 96.9    | 70.4   | 81.4    |
| Guinea              | 98.4   | 85.2    | 84.6   | 94.8    |
| Kenya               | 71.2   | 71.5    | 90.9   | 72.6    |
| Lesotho             | 100    | 90      | 100    | 96.9    |
| Liberia             | 99.3   | 65.5    | 92.5   | 93      |
| Madagascar          | 99.9   | 52.9    | 87     | 92.5    |
| Malawi              | 98.8   | 72.6    | 73.3   | 96.1    |
| Mali                | 99.4   | 76.6    | 91.7   | 96.6    |
| Morocco             | 96     | 73.6    | 81.9   | 84.7    |
| Mozambique          | 100    | 100     | 100    | 100     |
| Namibia             | 98.7   | 83.6    | 86.1   | 96.3    |

---

|              |      |      |      |      |
|--------------|------|------|------|------|
| Nigeria      | 99.5 | 74.9 | 93.6 | 93   |
| Rwanda       | 96.5 | 68.7 | 83.2 | 87.2 |
| Senegal      | 50   | 100  | 92.3 | 89.3 |
| Sierra Leone | 98.5 | 79.6 | 85.7 | 94   |
| Tanzania     | 98.4 | 74.6 | 79.4 | 93.4 |
| Togo         | 97.9 | 78.3 | 88.8 | 94.6 |
| Uganda       | 100  | 85.7 | 97.6 | 94.6 |
| Zambia       | 99.1 | 85.7 | 81.9 | 96.9 |
| Zimbabwe     | 100  | 76   | 75   | 84.1 |
| All          | 94.8 | 79.8 | 87.4 | 92.6 |

---

197

198

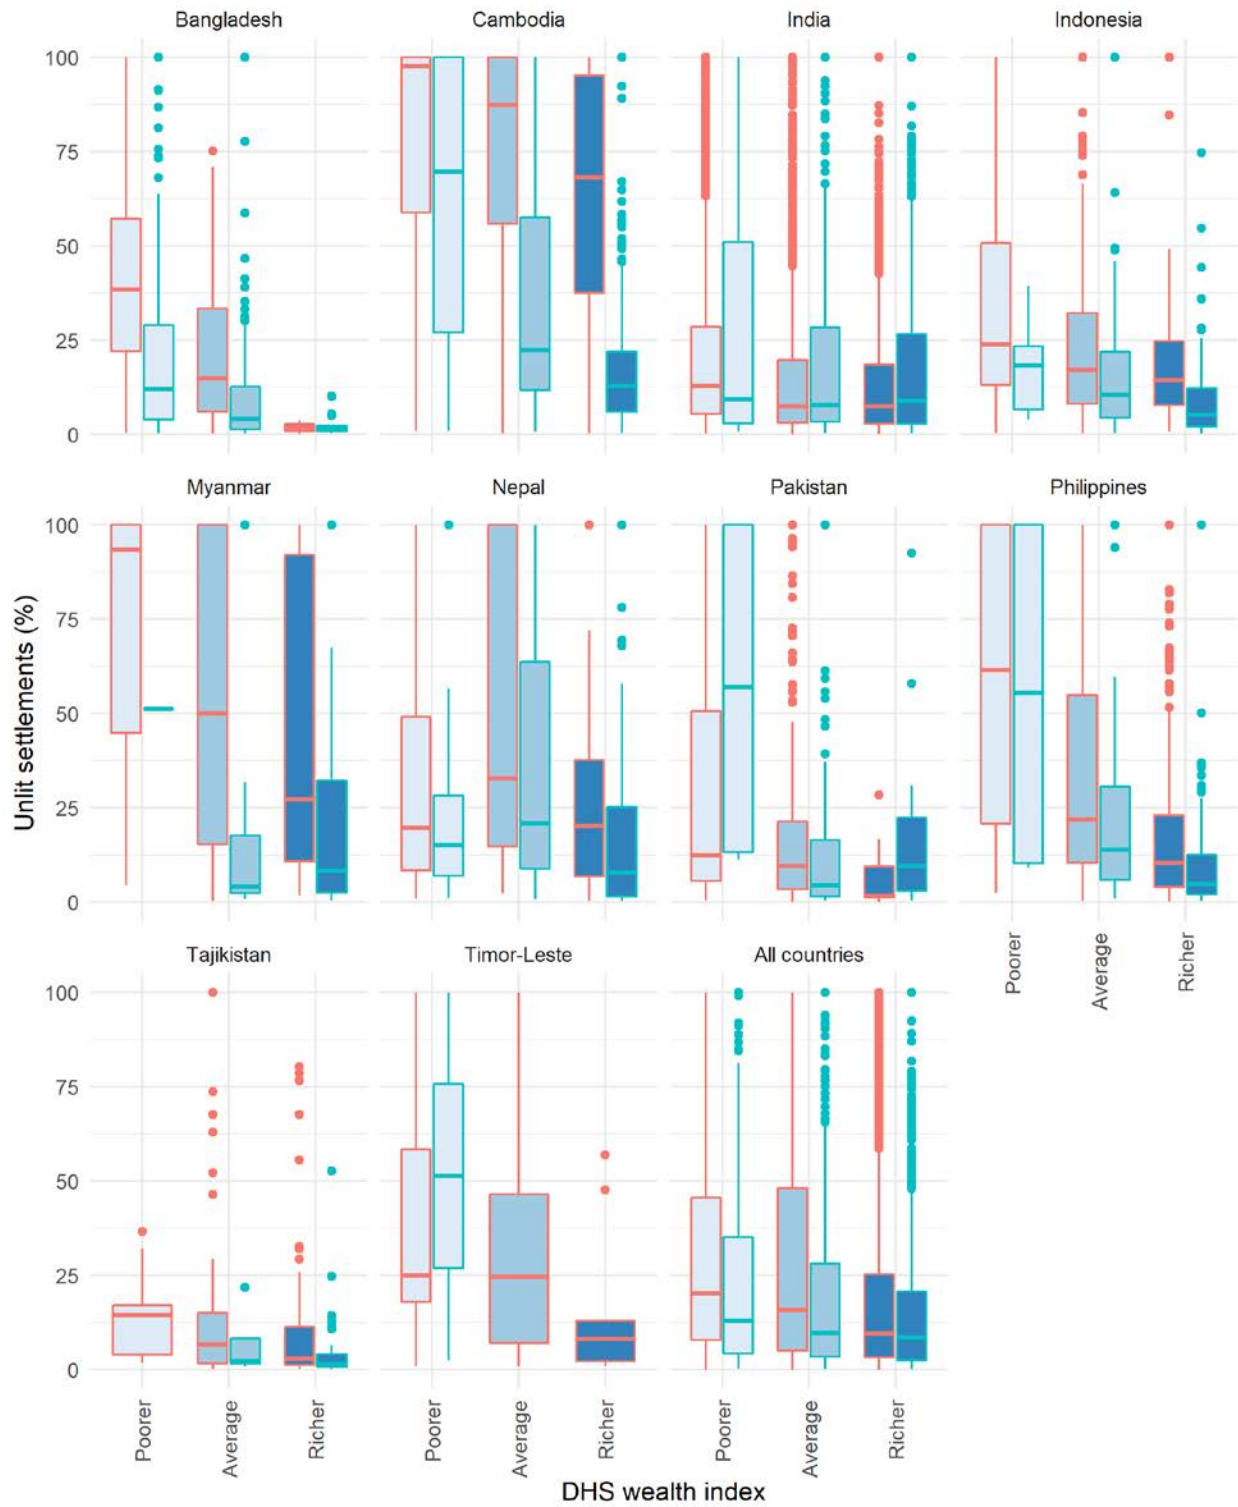

factor Poorer Average Richer    urban\_rural Rural Urban



200 Supplementary Fig. 8. Boxplots for Asian countries showing the mean percentage area of unlit  
 201 settlements within a 2 km buffer (urban) or 5 km buffer (rural) of a DHS household cluster  
 202 against the mode of the wealth indices of all households assigned to the household cluster. The  
 203 midline represents the median with the lower and upper limits of the box being the 1<sup>st</sup> and 3<sup>rd</sup>  
 204 quartiles.

205

206 Supplementary Table 7. Category-specific accuracy by country for Asia.

|             | Poorer | Average | Richer | Overall |
|-------------|--------|---------|--------|---------|
| Bangladesh  | 98.5   | 76.9    | 61.9   | 96.5    |
| Cambodia    | 78.6   | 38.1    | 49.9   | 62      |
| India       | 94.6   | 92.1    | 85.6   | 91.2    |
| Indonesia   | 46.4   | 94.3    | 81.5   | 77.4    |
| Myanmar     | 57.1   | 100     | 80     | 87.7    |
| Nepal       | 97.3   | 70.6    | 88.5   | 89.8    |
| Pakistan    | 51.6   | 91.2    | 85.8   | 85.7    |
| Philippines | 96     | 95.1    | 69     | 94.2    |
| Tajikistan  | 90.9   | 90.1    | 89.5   | 89.8    |
| Timor-Leste | 97.8   | 58.7    | 100    | 88.2    |
| All         | 80.9   | 80.7    | 79.2   | 86.2    |

207

208

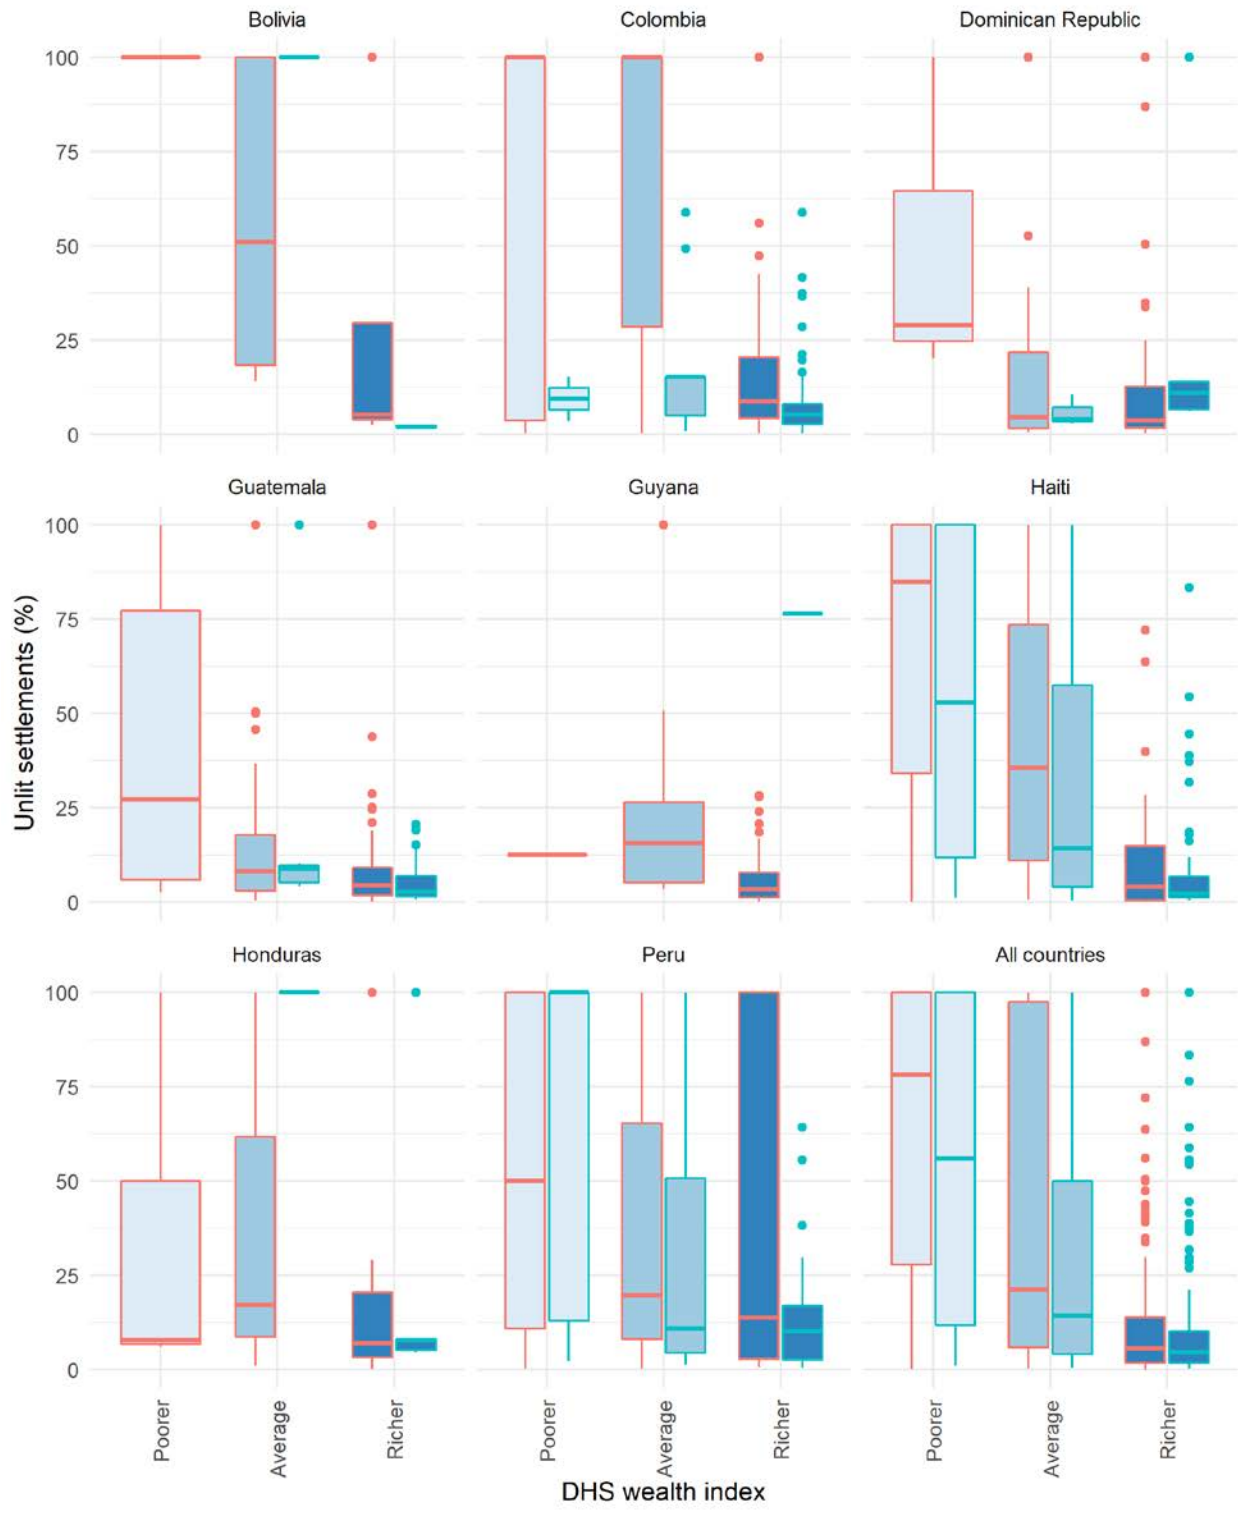

factor Poorer Average Richer urban\_rural Rural Urban

210 Supplementary Fig. 9. Boxplots for the Americas showing the mean percentage area of unlit  
 211 settlements within a 2 km buffer (urban) or 5 km buffer (rural) of a DHS household cluster  
 212 against the mode of the wealth indices of all households assigned to the household cluster. The  
 213 midline represents the median with the lower and upper limits of the box being the 1<sup>st</sup> and 3<sup>rd</sup>  
 214 quartiles.

215

216 Supplementary Table 8. Category-specific accuracy by country for the Americas.

|                    | Poorer | Average | Richer | Overall |
|--------------------|--------|---------|--------|---------|
| Bolivia            | 0      | 100     | 83.3   | 78.6    |
| Colombia           | 31.7   | 83.8    | 87.3   | 82.3    |
| Dominican Republic | 66.7   | 99.3    | 88.9   | 94      |
| Guatemala          | 68.8   | 89.9    | 94.6   | 91.6    |
| Guyana             | 100    | 100     | 100    | 100     |
| Haiti              | 45     | 90.6    | 76     | 77.8    |
| Honduras           | 96.9   | 75.1    | 78     | 87.5    |
| Peru               | 89.2   | 59.1    | 67.8   | 73.6    |
| All                | 62.3   | 87.2    | 84.5   | 85.7    |

217

218 Supplementary Table 9. Overall continent-specific accuracy (for urban and rural settlements)

| Continent     | Rural Accuracy (%) | Urban Accuracy (%) |
|---------------|--------------------|--------------------|
| Africa        | 92.5               | 84.4               |
| Asia          | 82.4               | 86.2               |
| North America | 82.2               | 83.6               |
| South America | 71.4               | 82.6               |

219

220

## 221 **Supplementary References**

222

223 1. Jean, N. *et al.* Combining satellite imagery and machine learning to predict poverty. *Science*

224 **353**, 790 (2016).

- 225 2. Chen, X. & Nordhaus, W. D. Using luminosity data as a proxy for economic statistics. *Proc*  
226 *Natl Acad Sci USA* **108**, 8589 (2011).
- 227 3. Proville, J., Zavala-Araiza, D. & Wagner, G. Night-time lights: A global, long term look at  
228 links to socio-economic trends. *PLOS ONE* **12**, e0174610 (2017).
- 229 4. Doll, C. N. H., Muller, J.-P. & Morley, J. G. Mapping regional economic activity from night-  
230 time light satellite imagery. *Ecological Economics* **57**, 75–92 (2006).
- 231 5. Henderson, J. V., Storeygard, A. & Weil, D. N. Measuring Economic Growth from Outer  
232 Space. *American Economic Review* **102**, 994–1028 (2012).
- 233 6. Pinkovskiy, M. & Sala-i-Martin, X. Lights, Camera ... Income! Illuminating the National  
234 Accounts-Household Surveys Debate \*. *The Quarterly Journal of Economics* **131**, 579–631  
235 (2016).
- 236 7. Kyba, C. C. M. *et al.* Artificially lit surface of Earth at night increasing in radiance and extent.  
237 *Sci Adv* **3**, (2017).
- 238
