# Supplementary material for: Estimating global economic well-being with unlit settlements
Source: PubMed Central journal article supplement (PMC9072384; doi:10.1038/s41467-022-30099-9), 2022-05-05
Supplement: 41467_2022_30099_MOESM2_ESM.pdf [file 41467_2022_30099_MOESM2_ESM.pdf]

## **Description of Additional Supplementary files**

File name: Supplementary Data 1

Description: National statistics of Total WSF settlement area (km<sup>2</sup>), Unlit WSF settlement area (km<sup>2</sup>), Total Unlit WSF (%), Urban Unlit (%) and Rural
